# Supplementary material for: Rbm20 regulates titin alternative splicing as a splicing repressor
Source: PubMed Central journal article supplement — Nucleic Acids Res. 2013 Jan 9;41(4):2659–72. doi: 10.1093/nar/gks1362 (PMC3575840; doi:10.1093/nar/gks1362), 2013-01-09

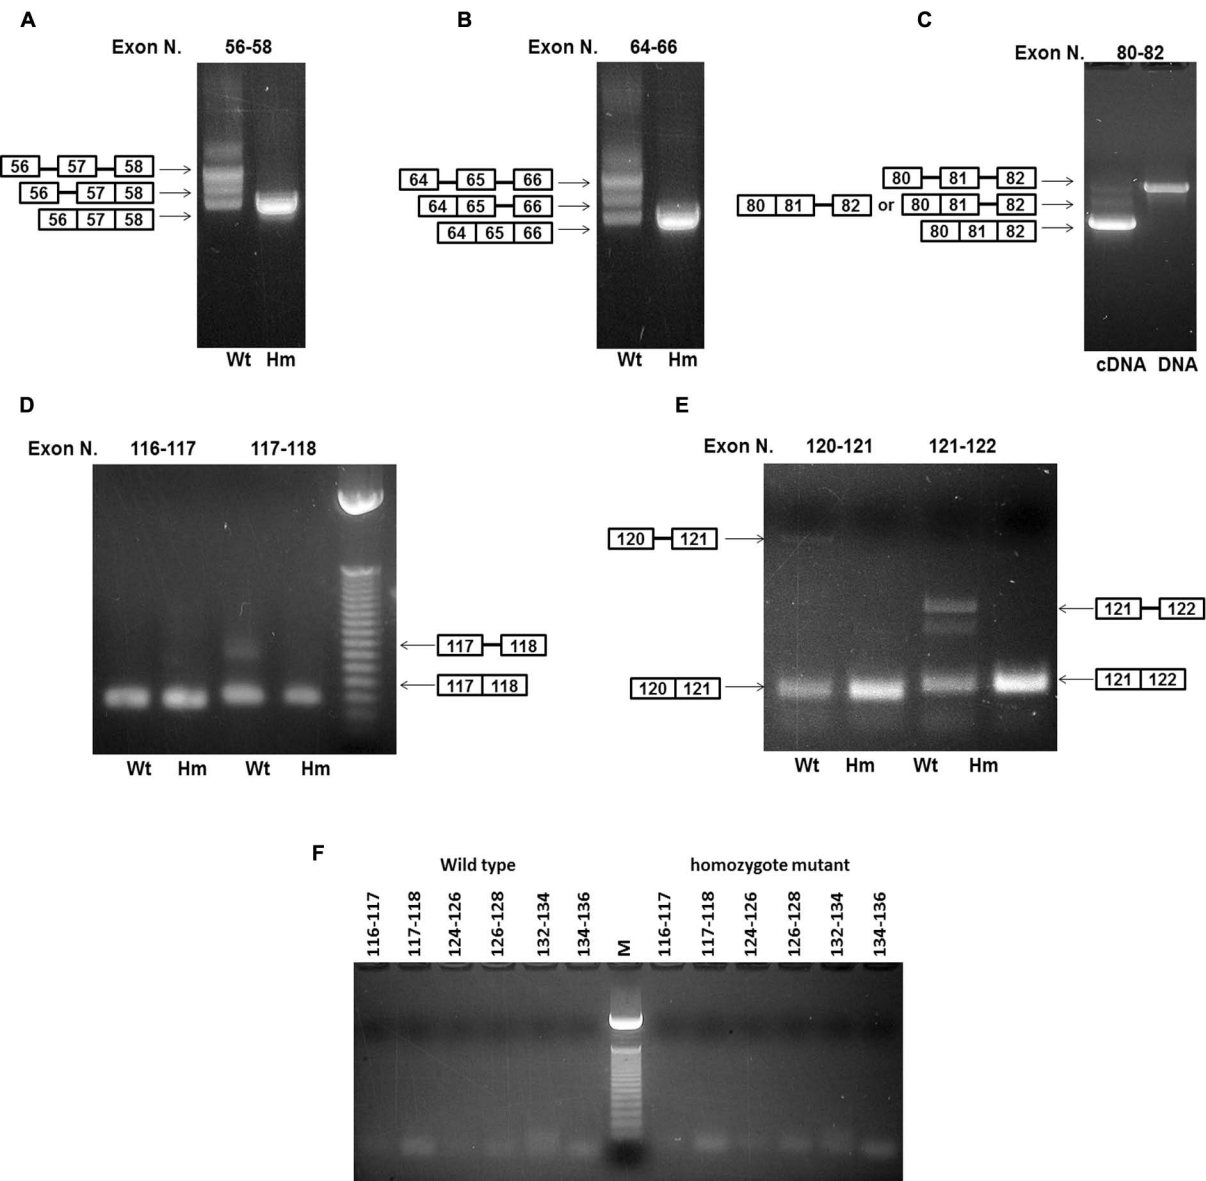

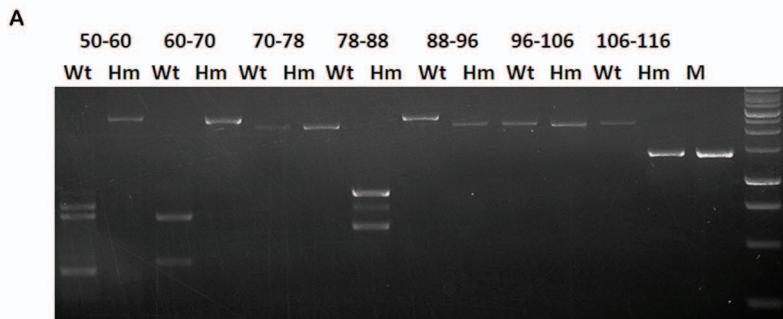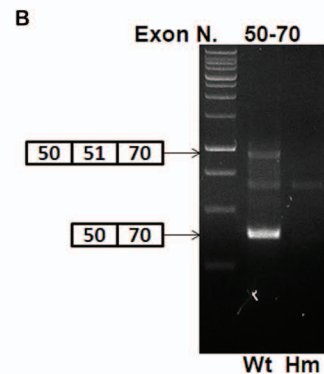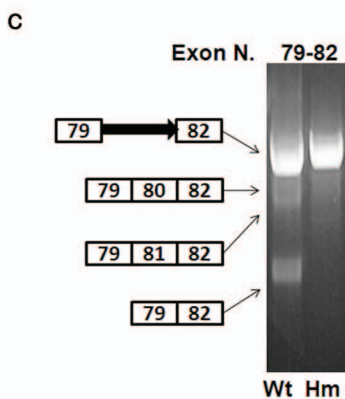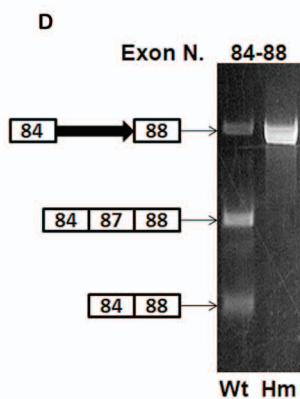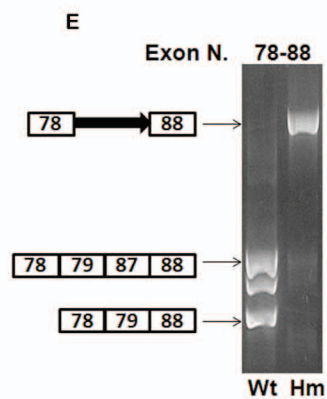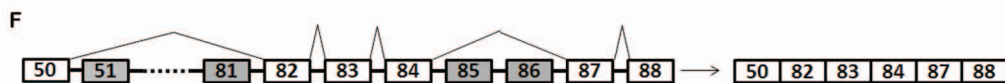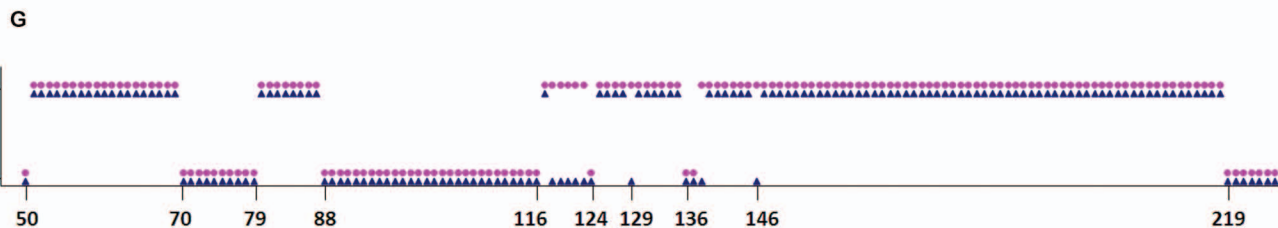

A 137 →

24 27 30 33 37 50 52 54 56 58 M 60 62 64 66 68 70 71 72 74 76 78 80 82 84 86 88 90 92 94 96

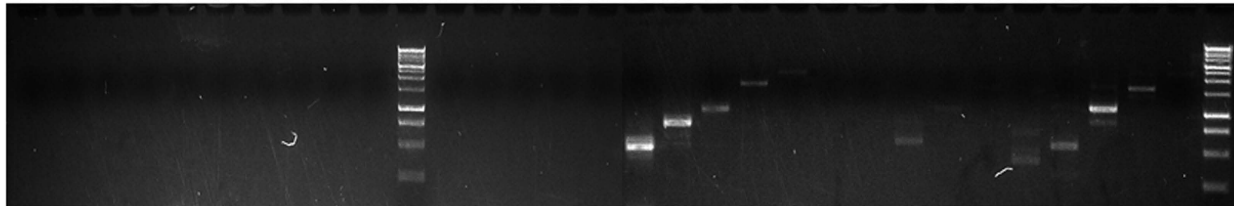

B 115-70 115-72 115-74 115-76 115-78 115-80 115-82 115-84 115-86 115-88 115-90 115-92 115-94 115-96  
 Wt Hm Wt Hm Wt Hm Wt Hm Wt Hm M Wt Hm Wt Hm

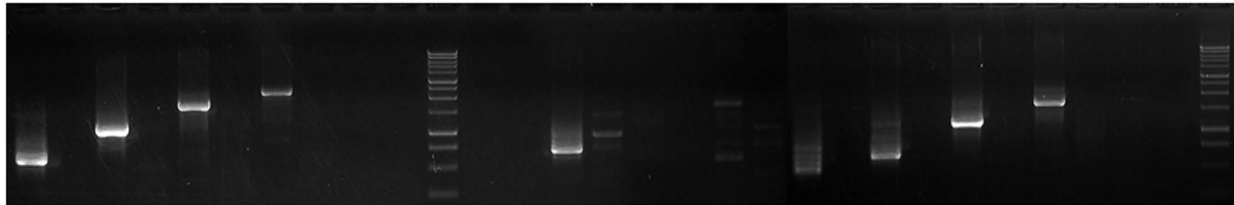

C 22-24 28-30 35-37 115-70 115-82 115-88  
 TTL PLA TTL PLA TTL PLA TTL PLA TTL PLA TTL PLA

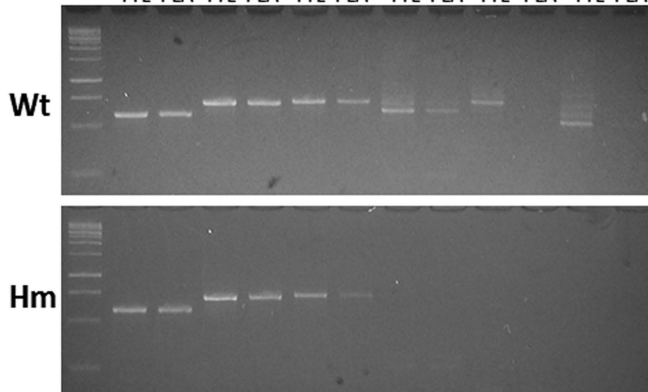

Rat

Supplementary Figure S4

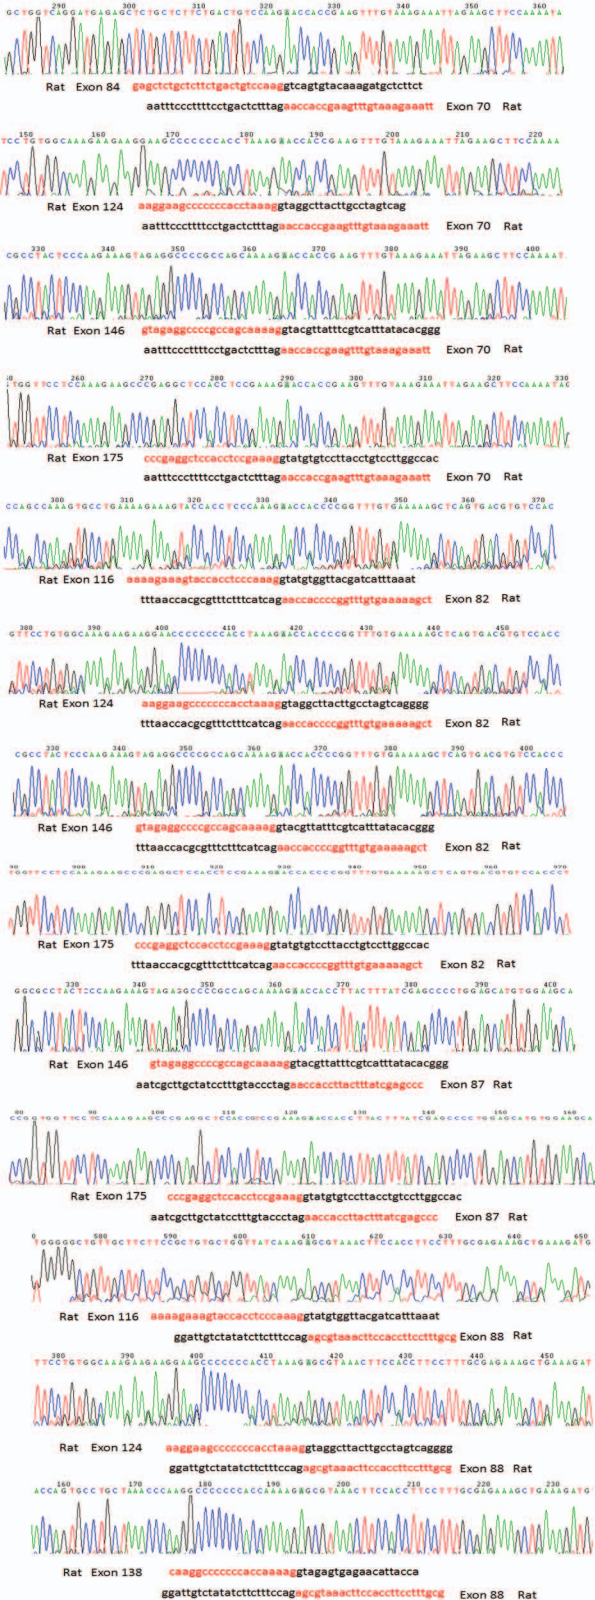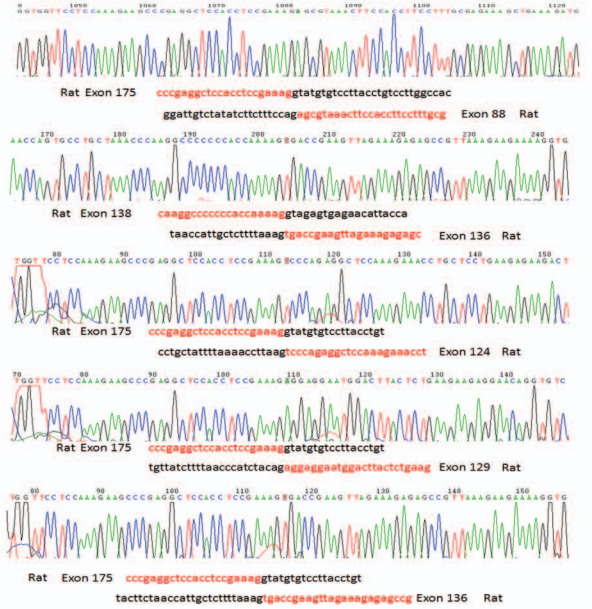

Human

## Supplementary Figure S5

**A**

**Rbm20**

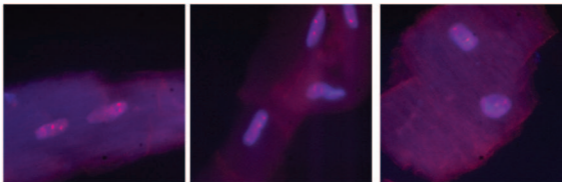

**B**

**Nucleoli**

**Splicing Speckles**

**Paraspeckles**

**Rbm20**

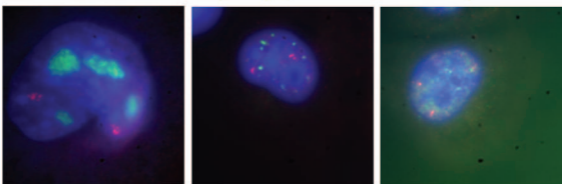

**Cajal bodies**

**Gems**

**PML bodies**

**Rbm20**

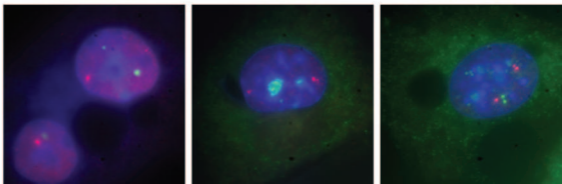

A

In HeLa cell

|                | 25-27 |   | 35-37 |   | 52-54 |   | 54-56 |   | 56-58 |   | 58-60 |   | 60-62 |   | 62-64 |   | 64-66 |   | 66-68 |   | 68-70 |   |
|----------------|-------|---|-------|---|-------|---|-------|---|-------|---|-------|---|-------|---|-------|---|-------|---|-------|---|-------|---|
| Control Vector | +     | - | +     | - | +     | - | +     | - | +     | - | +     | - | +     | - | +     | - | +     | - | +     | - | +     | - |
| Rbm20 Vector   | -     | + | -     | + | -     | + | -     | + | -     | + | -     | + | -     | + | -     | + | -     | + | -     | + | -     | + |

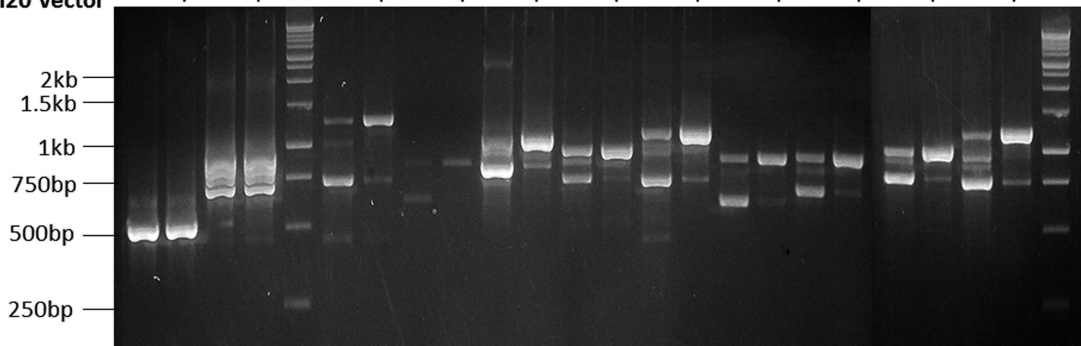

|     | 24-27 | 34-37 | 52-54 | 54-56 | 56-58 | 58-60 | 60-62 | 62-64 | 64-66 | 66-68 | 68-70 |
|-----|-------|-------|-------|-------|-------|-------|-------|-------|-------|-------|-------|
| DNA | 766   | 930   | 1244  | 777   | 1029  | 916   | 1075  | 853   | 881   | 984   | 1170  |
| RNA | 543   | 722   | 722   | 509   | 816   | 719   | 709   | 589   | 675   | 771   | 734   |

B

In living muscle

| 22-24 |    | 25-27 |    | 28-30 |    | 31-33 |    | 35-37 |    |
|-------|----|-------|----|-------|----|-------|----|-------|----|
| Wt    | Hm |

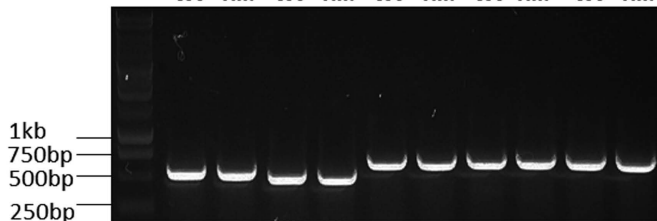

C

| Control Vector | - | - | + | + |
|----------------|---|---|---|---|
| Rbm20 Vector   | + | + | - | - |

Rbm20

SFRS1

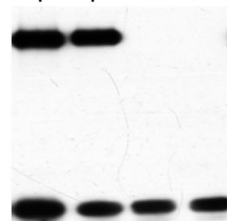

Supplement: supp_gks1362_nar-02274-c-2012-File010.pdf [file supp_gks1362_nar-02274-c-2012-File010.pdf]
